# Supplementary material for: Transcriptome-wide identification and expression analysis of the KT/HAK/KUP family in Salicornia europaea L. under varied NaCl and KCl treatments
Source: PeerJ. 2022 Mar 3;10:e12989. doi: 10.7717/peerj.12989 (PMC8898550; doi:10.7717/peerj.12989)
Supplement: Supplemental Information 1 [file peerj-10-12989-s001.xlsx]

## Sheet: Sheet1
Supplementary Table1. Primers used in Real-time quantitative polymerase chain reaction (RT-qPCR) analysis
Gene Name	Forward Primer	Reverse Primer
SeKUP1/10/12	TCCAATCCAACTCCCCAGAA	GCAATGGAAGGCAAGAAGAAGA
SeKUP2	AAGTTTCGGGACCTCAACGA	CAAAGCCCAAAGCAACAGCT
SeKUP3	TGGCACCTGTGAAAAGACGA	CTTGCTGAGCATCCCATAGATC
SeKUP4	ACCAATACGCTGTGATACCGA	CGCAAAGACGAACCCAACTC
SeKUP5	TTTGATTGGTGCGGGCATG	CCCTCGTTCAGTGACTTTTCG
SeKUP6	ATGTGCTGAAGTATGACCGAGAC	CCCTAGAGCATACCAAGCGTC
SeKUP7/9	CTCGCGGTCTAAATTGGCTCT	GCGGAAACAAGTGGAGTGG
SeKUP8/24	ACCAAGGGAGCTTGCGGTCTA	GGAGCGGTCACTCTTTCACG
SeKUP11/13	AGTGCGGTTTGTGGTCCCT	CATTCCCGATTCCCTAGCCT
SeKUP14	AGAAAGGATAATCAGTGGAAGCC	CCTCTATTCTCCGTTCCGTCAT
SeKUP15	CCGCCACGTTGTCAGAATT	GCCCTGATGACCTTGGTTTC
SeKUP16	GGGGCAAGCATCATTTCTCA	GCAGCCAGTGTAGCAATCACAA
SeKUP17	GAAGCATTACCACTCACGGATTA	GACTGCGGACAAGACAGACATT
SeKUP18/19	GTAGCCGAGTTCATGGAGTGC	TTCGTACCTTTGATTGGGGAT
SeKUP20	CTGGTGATGTGGGTCAGTATGC	AGTTGGCCGCTGGAAGTGT
SeKUP21/22	AACGACATTCGTACCAATCCG	TGCCTTTTGCTTCGGTGG
SeKUP23	TAATCGGTATCACAGCGTATTGG	TGTATGGTTATTGGGGATGGTCT
SeUBC	GGGCCAGTCGGTGAAGACAT	ATGCAACCTTTGGGGGCTTGA
