# Supplementary material for: Transcriptome-wide identification and expression analysis of the KT/HAK/KUP family in Salicornia europaea L. under varied NaCl and KCl treatments
Source: PeerJ. 2022 Mar 3;10:e12989. doi: 10.7717/peerj.12989 (PMC8898550; doi:10.7717/peerj.12989)
Supplement: Supplemental Information 2 [file peerj-10-12989-s002.xlsx]

## Sheet: sheet1
Supplementary Table2. Characteristics of full-length sequence SeKUPs
Gene name	MW(kDa)	PI	Extinction coefficients(assuming all pairs of Cys residues form cystines)	Estimated half-life	Instability index	Aliphatic index	GRAVY	Clusters
SeKUP1	86940.1	8.08	109055	>10 hours	41.13	106.91	0.234	II
SeKUP3	88098.7	6.37	128660	>10 hours	42.1	107.84	0.339	II
SeKUP4	88069.7	6.49	128660	>10 hours	41.68	107.97	0.341	II
SeKUP6	94669.3	5.79	113065	>10 hours	40.61	105.61	0.28	I
SeKUP7	94679.4	5.79	113065	>10 hours	40.49	105.61	0.279	I
SeKUP8	94683.4	5.86	107565	>10 hours	41.71	105.5	0.268	I
SeKUP9	94679.4	5.79	113065	>10 hours	40.49	105.61	0.279	I
SeKUP10	86940.1	8.08	109055	>10 hours	41.13	106.91	0.234	II
SeKUP11	87049.2	8.08	109055	>10 hours	40.29	105.77	0.222	II
SeKUP12	86940.1	8.08	109055	>10 hours	41.13	106.91	0.234	IV
SeKUP14	88159.9	7.35	126795	>10 hours	31.59	111.62	0.367	III
SeKUP15	88102.9	7.35	126795	>10 hours	31.33	111.64	0.367	III
