# Supplementary material for: Transcriptome-wide identification and expression analysis of the KT/HAK/KUP family in Salicornia europaea L. under varied NaCl and KCl treatments
Source: PeerJ. 2022 Mar 3;10:e12989. doi: 10.7717/peerj.12989 (PMC8898550; doi:10.7717/peerj.12989)
Supplement: Supplemental Information 3 [file peerj-10-12989-s003.xlsx]

## Sheet: Sheet1
Supplementary Table3. The accession number of KUP genes in Arabidopsis thaliana,Oryza sativa,Vitis vinifera and Zea mays
Gene name	Gene ID	Gene name	Gene ID	Gene name	Gene ID	Gene name	Gene ID
AtKUP/HAK/KT1	NM_117416.3	OsHAK1	XM_015780280.2	VvKUP1	NM_001280973.1	ZmHAK1	NM_001357849.1
AtKUP/HAK/KT2	NM_001336238.1	OsHAK2	XM_015761958.2	VvKUP2	XM_019221187.1	ZmHAK2	K7V1X3
AtKUP3	NM_001336844.1	OsHAK3	XM_015766994.2	VvKUP3	XM_002264701.3	ZmHAK3	NM_001301625.1
AtKUP4	NM_111071.3	OsHAK4	XM_015793953.1	VvKUP4	XM_002265329.3	ZmHAK4	XM_008680221.2
AtKUP/KT5	NM_118495.4	OsHAK5	XM_015766817.1	VvKUP5	NM_001280974.1	ZmHAK5	NM_001322107.1
AtHAK5	NM_119508.4	OsHAK6	XM_015791100.1	VvKUP6	XM_010660241.2	ZmHAK6	NM_001301545.1
AtKUP/HAK/KT6	NM_105698.5	OsHAK7	XM_015791505.2	VvKUP7	XM_010662357.2	ZmHAK7	XM_008674476.2
AtKUP/HAK/KT7	NM_120977.3	OsHAK8	XM_015774977.2	VvKUP8	XM_010649633.2	ZmHAK8	NM_001159448.1
AtKUP/HAK/KT8	NM_121492.2	OsHAK9	XM_015792119.2	VvKUP9	XM_010654989.2	ZmHAK9	NM_001154000.2
AtKUP/HAK/KT9	NM_001203846.2	OsHAK10	XM_015788218.1	VvKUP10	XM_002274543.4	ZmHAK10	XM_008670670.3
AtKUP/HAK/KT10	NM_102850.4	OsHAK11	XM_015780215.2	VvKUP11	XM_010662640.2	ZmHAK11	XM_008664514.3
AtKUP/HAK/KT11	NM_001036407.2	OsHAK12	XM_015794867.2	VvKUP12	XM_002276225.4	ZmHAK12	NM_001152883.1
AtKUP/HAK/KT12	NM_001036407.2	OsHAK13	XM_015785900.2	VvKUP13	XM_010654998.2	ZmHAK13	XM_020540316.1
		OsHAK14	XM_015792248.2	VvKUP14	XM_002281750.3	ZmHAK14	NM_001360563.1
		OsHAK15	XM_015780900.2	VvKUP15	XM_010661515.2	ZmHAK15	XM_008666780.3
		OsHAK16	XM_015777705.2	VvKUP16	XM_010652583.2	ZmHAK16	NM_001301608.1
		OsHAK17	XM_015795694.2	VvKUP17	XM_010646558.2	ZmHAK17	XM_008653529.2
		OsHAK18	XM_015755786.1			ZmHAK18	XM_020540277.2
		OsHAK19	XM_015767954.2			ZmHAK19	XM_008664950.3
		OsHAK20	XM_026023048.1			ZmHAK20	NM_001301494.1
		OsHAK21	XM_026023848.1			ZmHAK21	XM_020539988.1
		OsHAK22	XM_015789184.2			ZmHAK22	NM_001175778.1
		OsHAK23	XM_015756617.2			ZmHAK23	NM_001362073.1
		OsHAK24	XM_015785511.2			ZmHAK24	NM_001362559.1
		OsHAK25	XM_015769968.2			ZmHAK25	NM_001137294.1
		OsHAK26	XM_015792721.2			ZmHAK26	NM_001155458.1
		OsHAK27	XM_015772553.2			ZmHAK27	NM_001301607.1
