# Supplementary material for: Transcriptome-wide identification and expression analysis of the KT/HAK/KUP family in Salicornia europaea L. under varied NaCl and KCl treatments
Source: PeerJ. 2022 Mar 3;10:e12989. doi: 10.7717/peerj.12989 (PMC8898550; doi:10.7717/peerj.12989)
Supplement: Supplemental Information 4 [file peerj-10-12989-s004.xlsx]

## Sheet: sheet1
Table 3. Conserved amino acid motifs and annotation of SeKUP genes
No.	E-value	Width	Sites	Consensous sequence	Annotation	Members harbored motif
1	4.6e-3849	50	101	[IV][VI][AG]SQA[MI]I[ST][AG]TFSII[KS]Q[SCA]L[AS]LGCFPRVK[IV][VI]HTS[RK]K[FIY][HE]GQ[IV]YIPE[IV]NWILM	K+ potassium transporter	SeKUP1; 3; 4; 5; 6; 7; 8; 9; 10; 11; 12; 13; 14; 15; 16; 17; 18; 19.
2	5.8e-3676	50	102	WMSLGG[IV][LV]L[CS]ITG[TS]EA[ML]FADLG[HY]FSV[RL][SA][IV]Q[IL]AFTF[VL]V[YF]P[CS]L[LIV]LAYMGQAA	K+ potassium transporter	SeKUP1; 2; 3; 4; 5; 6; 7; 8; 9; 10; 11; 12; 13; 14; 15; 16; 17; 18; 19.
3	4.8e-2198	34	101	F[SA][LV]Q[HR][YF]GT[DHS][KR]VGFLFAPI[VLI]LLW[LF]L[CL]I[SGA]GIG[LI]YN[IL]	K+ potassium transporter	SeKUP1; 3; 4; 5; 6; 7; 8; 9; 10; 11; 12; 13; 14; 15; 16; 17; 18; 19; 24.
4	1.5e-2030	33	94	[IV][LF]G[VA]LS[LF][IV][FIL][WY][TS]LTLIPL[LV]KYV[FL][IV]VLRA[DN]D[ND]G[ED]G	K+ potassium transporter	SeKUP1; 3; 4; 5; 6; 7; 8; 9; 10; 11; 12; 13; 14; 15; 17; 18; 19; 24.
5	1.1e-2409	38	99	G[VI]P[AP]IF[SG]HF[VI]TNLP[AS][FI]H[SQ]VL[VI]FV[CS][IV]K[SY][VL]P[VI]PHVPPEER	K+ potassium transporter	SeKUP1; 3; 4; 5; 6; 7; 8; 9; 10; 11; 12; 14; 15; 16; 17; 18; 19.

## Sheet: Sheet2
Supplementary Table4. Conserved amino acid motifs and annotation of SeKUPs
No.	Width	Sites	E-value	Consensous sequence	Annotation	Members harbored motif	Total number of SeKUPs
1	50	101	4.6e-3849	IVASQAMISATFSIIKQSLALGCFPRVKIVHTSRKFHGQIYIPEINWILM	K+ potassium transporter	SeKUP1;3;4;5;6;7;8;9;10;11;12;13;14;15;16;17;18;19.	18
2	50	102	5.8e-3676	WMSLGGILLCITGTEAMFADLGHFSVRSIQJAFTFVVYPCLLLAYMGQAA	K+ potassium transporter	SeKUP1;2;3;4;5;6;7;8;9;10;11;12;13;14;15;16;17;18;19.	19
3	34	101	4.8e-2198	FSLQHYGTDKVGFLFAPIVLLWLLCISGIGLYNI	K+ potassium transporter	SeKUP1;3;4;5;6;7;8;9;10;11;12;13;14;15;16;17;18;19.	18
4	33	94	1.5e-2030	ILGVLSLIFYTLTLIPLLKYVFIVLRABDNGEG	K+ potassium transporter	SeKUP1;3;4;5;6;7;8;9;10;11;12;13;14;15;17;18;19;24.	18
5	38	99	1.1e-2409	GVPAIFSHFVTNLPAFHSVLVFVCIKSVPVPHVPPEER	K+ potassium transporter	SeKUP1;3;4;5;6;7;8;9;10;11;12;14;15;16;17;18;19.	17
6	50	101	5.9e-2869	ELLYFSAVLYKFDZGGWVPJALSLVFMLIMYVWHYGTVKKYEFELQNKVS	K+ potassium transporter	SeKUP1;3;4;5;6;7;8;9;10;11;12;14;15;16;17;18;19.	17
7	50	101	6.8e-2814	LCLAVTIGFRDTKHIGNAYGJAVITVMLVTTCLMTLVMLLVWKKNIILVL	K+ potassium transporter	SeKUP1;3;4;5;6;7;8;9;10;11;12;14;15;16;17;18;19.	17
8	50	94	2.5e-2665	LGHSYVRARKGSSFLKKJAINYGYAFLRKNCRGPSVALSIPHASLLEVGM	K+ potassium transporter	SeKUP1;3;4;5;6;7;8;9;10;11;12;14;15;16;17;18;19.	17
9	41	99	1.0e-2401	LEKHKKLKTALLJLVLLGTCMVIGDGVLTPAISVLSAVSGL	K+ potassium transporter	SeKUP1;3;4;5;6;7;8;9;10;11;12;13;14;15;16;17;18;19;24.	19
10	21	96	2.4e-1426	GTFALYSLJCRHAKVSLJPNQ	None predicted	SeKUP1;3;4;5;6;7;8;9;10;11;12;13;14;15;16;17;18;19;24.	19
