# Supplementary material for: Transcriptome-wide identification and expression analysis of the KT/HAK/KUP family in Salicornia europaea L. under varied NaCl and KCl treatments
Source: PeerJ. 2022 Mar 3;10:e12989. doi: 10.7717/peerj.12989 (PMC8898550; doi:10.7717/peerj.12989)
Supplement: Supplemental Information 5 [file peerj-10-12989-s005.xlsx]

## Sheet: KCl treatments
Supplementary Table5. Real-time quantitative polymerase chain reaction (RT-qPCR) analysis of SeKUPs in S. europaea under KCl treatments
		SeKUP1/10/12		SeKUP2		SeKUP3		SeKUP4		SeKUP5		SeKUP6		SeKUP7/9		SeKUP8/24		SeKUP11/13		SeKUP14		SeKUP15		SeKUP16		SeKUP17		SeKUP18/19		SeKUP20		SeKUP21/22		SeKUP23		UBC gene
Repeat	Treatments	Ct value	relative expression level	Ct value	relative expression level	Ct value	relative expression level	Ct value	relative expression level	Ct value	relative expression level	Ct value	relative expression level	Ct value	relative expression level	Ct value	relative expression level	Ct value	relative expression level	Ct value	relative expression level	Ct value	relative expression level	Ct value	relative expression level	Ct value	relative expression level	Ct value	relative expression level	Ct value	relative expression level	Ct value	relative expression level	Ct value	relative expression level
1	2.5k-0h-root	23.0455	1.19623	23.5355	1.15479	23.17	0.973927	22.5915	1.16346	21.7625	1.04076	22.196	1.05763	22.122	1.10439	23.555	1.02754	22.5535	1.23685	24.3345	0.971321	25.948	1.01166	29.8585	0.940244	26.9295	1.12003	27.9895	1.06629	30.012	1.32966	25.168	1.09679	24.862	1.06401	18.4115
1	2.5k-0h-root	23.283	1.02811	23.6855	1.05455	22.9775	1.1277	22.886	0.961205	21.7345	1.07523	22.2855	1.00719	22.305	0.985723	23.586	1.01903	23.1335	0.838377	24.1165	1.14474	25.9435	1.02827	29.627	1.11853	27.2875	0.885481	27.9895	1.08043	30.555	0.924699	25.285	1.02476	25.0295	0.959941	18.4305
1	2.5k-0h-root	23.349	0.775659	23.7605	0.79066	22.965	0.898372	22.6805	0.87534	21.6765	0.884013	22.052	0.935189	22.08	0.909884	23.3415	0.953428	22.6515	0.924773	24.149	0.88394	25.702	0.960075	29.5355	0.941223	26.7795	0.994493	27.9895	0.853285	30.525	0.745642	25.1668	0.878452	24.665	0.976044	18.09
2	2.5k-6h-root	24.588	1.38271	26.536	0.485866	25.991	0.464061	24.581	0.986517	22.701	1.82847	23.101	1.90175	23.917	1.07159	25.038	1.23773	23.417	2.28893	26.163	0.920838	23.803	15.0659	27.388	17.5465	30.018	0.443355	31.867	0.244279	31.468	1.6319	26.467	1.50086	24.926	3.42717	20.163
2	2.5k-6h-root	24.656	1.84868	26.399	0.748788	25.969	0.660388	24.506	1.45641	22.961	2.14004	23.273	2.3658	23.957	1.4608	25.462	1.29298	23.74	2.56449	26.217	1.24317	24.175	16.316	27.751	19.1213	30.247	0.530172	31.882	0.338822	31.975	1.60944	26.826	1.6401	25.664	2.8799	20.65
2	2.5k-6h-root	24.725	1.77092	26.503	0.700098	26.127	0.594762	24.579	1.39128	22.873	2.28571	23.193	2.51286	24.048	1.37817	25.529	1.24031	23.799	2.4737	26.268	1.20582	24.191	16.2146	27.656	20.5221	30.293	0.516032	31.884	0.339998	31.802	1.8233	26.832	1.64124	25.694	2.83435	20.657
3	2.5K-24h-root	23.411	1.34676	26.268	0.252023	26.283	0.163276	24.177	0.562301	23.743	0.382529	23.854	0.486101	23.317	0.699674	24.174	0.97043	23.767	0.773606	24.531	1.22946	24.651	3.60555	27.687	6.1437	31.917	0.0512087	31.921	0.101363	32.175	0.43064	24.668	2.24978	24.804	1.60661	18.948
3	2.5K-24h-root	23.882	1.04066	26.194	0.284131	26.214	0.183441	24.106	0.632622	23.742	0.409984	23.675	0.589404	23.645	0.59698	24.324	0.936724	23.53	0.976486	24.69	1.17937	24.654	3.85363	27.665	6.6812	31.889	0.055921	31.986	0.10378	32.373	0.40208	24.717	2.32912	24.791	1.7363	19.047
3	2.5K-24h-root	23.875	1.12389	26.23	0.297844	26.186	0.201016	24.171	0.649957	23.809	0.420635	23.932	0.530097	23.388	0.766711	24.636	0.810957	23.658	0.960376	24.688	1.26929	24.624	4.22871	27.741	6.81214	31.963	0.057096	31.927	0.116193	32.304	0.453306	24.926	2.16563	25.043	1.56701	19.151
4	2.5K-48h-root	23.595	3.07055	25.147	1.41974	25.517	0.71916	23.182	2.90274	23.505	1.16849	23.848	1.26429	22.829	2.54163	23.822	3.20805	23.377	2.62564	28.194	0.251394	25.57	4.939	28.457	9.33149	33.124	0.0574533	31.807	0.284125	34.866	0.172726	27.002	1.15571	28.061	0.435281	20.321
4	2.5K-48h-root	22.719	3.57885	25.588	0.664172	25.578	0.437812	23.07	1.99227	22.792	1.21642	23.176	1.27928	23.203	1.24553	23.28	2.96637	23.004	2.15946	27.761	0.215539	25.016	4.60506	28.444	5.97984	33.003	0.0396794	31.072	0.300326	34.421	0.149328	26.651	0.936133	27.374	0.445043	19.666
4	2.5K-48h-root	23.219	5.28717	25.593	1.38284	25.512	0.957527	23.152	3.93242	23.962	1.12946	24.38	1.16016	23.679	1.87093	24.177	3.32809	23.761	2.66969	27.215	0.65748	25.817	5.52211	28.467	12.2959	33.875	0.0452962	31.525	0.458375	34.601	0.275391	27.669	0.965793	28.621	0.391754	20.729
5	0.01K-0h-root	23.0455	1.19623	23.5355	1.15479	23.17	0.973927	22.5915	1.16346	21.7625	1.04076	22.196	1.05763	22.122	1.10439	23.555	1.02754	22.5535	1.23685	24.3345	0.971321	25.948	1.01166	29.8585	0.940244	26.9295	1.12003	27.9895	1.06629	30.012	1.32966	25.168	1.09679	24.862	1.06401	18.4115
5	0.01K-0h-root	23.283	1.02811	23.6855	1.05455	22.9775	1.1277	22.886	0.961205	21.7345	1.07523	22.2855	1.00719	22.305	0.985723	23.586	1.01903	23.1335	0.838377	24.1165	1.14474	25.9435	1.02827	29.627	1.11853	27.2875	0.885481	27.9895	1.08043	30.555	0.924699	25.285	1.02476	25.0295	0.959941	18.4305
5	0.01K-0h-root	23.349	0.775659	23.7605	0.79066	22.965	0.898372	22.6805	0.87534	21.6765	0.884013	22.052	0.935189	22.08	0.909884	23.3415	0.953428	22.6515	0.924773	24.149	0.88394	25.702	0.960075	29.5355	0.941223	26.7795	0.994493	27.9895	0.853285	30.525	0.745642	25.1668	0.878452	24.665	0.976044	18.09
6	0.01K-6h-root	24.975	2.63626	25.73	2.11789	25.71	1.40579	23.974	3.74617	23.832	2.08152	23.497	3.60333	21.825	11.3905	25.58	2.11946	23.596	5.04086	27.73	0.774866	25.881	8.89638	30.228	6.10973	32.395	0.212795	31.917	0.58829	34.654	0.447065	28.082	1.22161	28.81	0.578752	21.481
6	0.01K-6h-root	24.928	2.61624	25.748	2.00921	25.557	1.50148	23.992	3.55393	23.605	2.34021	23.306	3.95131	21.807	11.079	25.495	2.1595	23.591	4.85904	26.404	1.86609	25.719	9.56138	30.108	6.37802	32.365	0.208704	31.987	0.538344	34.512	0.473868	28.453	0.907384	28.798	0.56059	21.423
6	0.01K-6h-root	24.886	2.43091	25.627	1.97196	25.517	1.39318	23.988	3.21633	23.466	2.32566	23.211	3.80878	21.576	11.7351	25.404	2.07584	23.537	4.55254	26.905	1.19005	25.602	9.35812	30.214	5.3484	32.125	0.222447	31.851	0.533884	34.163	0.544708	28.253	0.940686	28.772	0.515133	21.275
7	0.01K-24h-root	23.883	2.83332	26.107	0.822239	24.629	1.4994	23.656	2.35449	26.826	0.131728	24.116	1.1829	23.381	1.95308	27.42	0.298478	32.307	0.00606478	29.816	0.0920154	28.595	0.683597	32.876	0.491447	31.782	0.164087	31.837	0.313513	34.291	0.289886	27.615	0.851327	27.211	0.883939	20.493
7	0.01K-24h-root	23.984	3.00319	26.135	0.916768	24.619	1.7164	23.633	2.71964	26.912	0.141085	24.104	1.35597	23.447	2.12101	27.386	0.347406	32.903	0.00456133	30.277	0.0759935	28.757	0.694583	32.868	0.561792	31.72	0.194728	31.909	0.339057	34.413	0.302825	28.895	0.398537	27.38	0.893796	20.678
7	0.01K-24h-root	23.956	2.94342	26.191	0.847702	24.698	1.56199	23.667	2.55339	26.786	0.147997	24.105	1.30254	23.393	2.11661	27.108	0.404917	32.5	0.0057976	30.534	0.0611298	28.628	0.730127	32.8	0.566092	31.993	0.154913	31.956	0.315475	34.322	0.310046	28.371	0.550871	27.323	0.893796	20.621
8	0.01K-48h-root	24.355	1.66612	24.924	1.5227	24.933	0.990607	22.704	3.71514	23.178	1.3469	23.157	1.87557	21.501	5.86347	24.517	1.82096	21.944	6.51457	27.877	0.287776	25.943	3.50452	29.183	5.18415	32.402	0.0870829	31.967	0.233679	34.742	0.172965	25.64	2.72978	27.278	0.688256	20.199
8	0.01K-48h-root	24.398	1.66151	24.957	1.52904	24.886	1.05145	22.677	3.88904	23.096	1.46473	23.167	1.91365	21.476	6.12944	24.146	2.41948	21.999	6.44272	27.897	0.291591	25.995	3.47309	29.038	5.88935	32.561	0.0801326	31.929	0.24649	34.645	0.190064	26.283	1.796	27.348	0.673625	20.238
8	0.01K-48h-root	24.312	1.70113	24.986	1.44556	24.868	1.02696	22.71	3.66653	23.159	1.35251	23.165	1.84847	21.379	6.32363	24.244	2.18056	21.978	6.30576	27.983	0.264992	25.752	3.96472	29.227	4.98332	32.261	0.0951622	31.924	0.238589	34.606	0.188359	26.506	1.4843	27.305	0.669436	20.186
9	2.5k-0h-shoot	22.125	1.80562	23.5645	0.902582	24.8635	0.24013	23.8715	0.382072	23.3125	0.283445	24.29	0.197555	27.3765	0.0230715	22.7	1.48216	22.786	0.83954	23.2825	1.60605	26.0355	0.759288	29.7295	0.81995	26.569	1.14674	27.6675	1.06297	30.8985	0.573576	24.0425	1.9083	24.6685	0.97031	18.085
9	2.5k-0h-shoot	22.149	1.89539	24	0.712336	24.635	0.300281	23.785	0.432993	24.138	0.170712	24.424	0.192153	26.7	0.0393567	22.8895	1.38722	22.784	0.897305	23.3035	1.68941	26.042	0.806764	29.312	1.16886	26.679	1.13409	28.1065	0.836884	30.984	0.576965	24.089	1.97217	24.5415	1.13094	18.179
9	2.5k-0h-shoot	22.305	1.75686	23.9425	0.765582	25.071	0.229233	23.8079	0.440142	23.511	0.272276	24.9185	0.14086	27.0225	0.0325038	23.1075	1.23174	22.8215	0.902921	23.254	1.80565	26.152	0.772024	29.266	1.24626	26.8545	1.03708	28.078	0.881541	30.7825	0.68518	24.277	1.78792	24.482	1.21716	18.2255
10	2.5k-6h-shoot	21.207	1.88752	21.426	2.19867	21.981	0.979682	23.367	0.299871	20.949	0.806999	21.968	0.546514	21.822	0.599883	23.324	0.532073	23.507	0.281786	24.001	0.539996	23.787	1.99615	26.652	3.82937	27.96	0.241908	28.075	0.443375	27.791	2.73503	23.057	2.09041	22.694	2.10967	17.231
10	2.5k-6h-shoot	21.502	1.52467	21.586	1.95021	21.967	0.980361	23.072	0.364607	21.01	0.76665	22.125	0.485765	22.822	0.297251	23.873	0.360406	23.36	0.309213	24.09	0.503136	23.786	1.97961	26.62	3.88014	27.766	0.274244	28.268	0.384378	27.862	2.58033	22.49	3.06904	22.941	1.76176	17.218
10	2.5k-6h-shoot	21.317	2.39246	21.967	2.06713	21.928	1.39029	23.941	0.275556	21.024	1.048	22.223	0.626475	22.294	0.591625	23.564	0.616297	23.265	0.455863	24.067	0.705648	23.728	2.84459	26.794	4.7473	27.712	0.392981	27.919	0.675768	28.205	2.80803	22.12	5.47472	23.061	2.2377	17.683
11	2.5k-24h-shoot	21.66	7.91997	22.381	6.51439	22.702	3.41382	21.446	6.52246	23.216	0.963021	22.779	1.78922	23.767	0.894873	21.794	8.82561	23.22	1.97475	23.581	4.14974	23.163	17.6699	28.482	6.18643	26.33	4.30058	26.756	6.35371	27.321	21.7592	23.301	10.1386	23.385	7.50586	19.753
11	2.5k-24h-shoot	21.751	7.40498	22.476	6.07393	22.683	3.44472	21.479	6.3485	23.21	0.963021	22.715	1.86261	23.758	0.896735	21.829	8.57833	23.085	2.15946	23.697	3.81325	23.108	18.2803	28.588	5.72433	26.258	4.5019	26.577	7.16318	27.444	19.8981	23.197	10.8512	23.547	6.68079	19.747
11	2.5k-24h-shoot	21.733	7.49794	22.668	5.31706	22.765	3.25439	21.452	6.46843	23.198	0.971065	22.802	1.75361	23.804	0.868594	21.766	8.96123	23.051	2.21096	23.665	3.89877	23.17	17.5114	28.6	5.67692	26.285	4.41843	26.652	6.8003	27.326	21.594	23.018	12.2847	23.526	6.77874	19.747
12	2.5k-48h-shoot	22.587	1.39136	22.381	2.17593	24.721	0.28134	22.974	0.755454	22.866	0.409984	22.625	0.664955	22.744	0.607415	23.232	1.08801	21.799	1.76623	21.159	7.42824	21.619	17.2105	27.511	4.05052	25.42	2.6992	25.581	4.79191	26.551	12.3939	21.791	9.64503	23.791	1.89214	18.171
12	2.5k-48h-shoot	22.417	1.58172	22.314	2.30318	24.599	0.309366	23.181	0.661318	22.704	0.463499	22.769	0.608078	22.872	0.561654	23.548	0.883129	21.747	1.85019	21.126	7.67954	21.622	17.3543	27.347	4.58559	25.38	2.80409	25.48	5.19311	26.428	13.638	21.782	9.80682	23.959	1.70175	18.186
12	2.5k-48h-shoot	22.452	1.50576	22.336	2.21243	24.706	0.280172	23.008	0.727196	22.655	0.467695	22.851	0.560323	22.848	0.557002	23.6	0.830871	21.665	1.91013	21.181	7.2101	21.647	16.6358	27.402	4.30528	24.95	3.68466	25.612	4.62226	26.454	13.0643	21.727	9.93683	23.999	1.61442	18.15
13	0.01K-0h-shoot	22.125	1.80562	23.5645	0.902582	24.8635	0.24013	23.8715	0.382072	23.3125	0.283445	24.29	0.197555	27.3765	0.0230715	22.7	1.48216	22.786	0.83954	23.2825	1.60605	26.0355	0.759288	29.7295	0.81995	26.569	1.14674	27.6675	1.06297	30.8985	0.573576	24.0425	1.9083	24.6685	0.97031	18.085
13	0.01K-0h-shoot	22.149	1.89539	24	0.712336	24.635	0.300281	23.785	0.432993	24.138	0.170712	24.424	0.192153	26.7	0.0393567	22.8895	1.38722	22.784	0.897305	23.3035	1.68941	26.042	0.806764	29.312	1.16886	26.679	1.13409	28.1065	0.836884	30.984	0.576965	24.089	1.97217	24.5415	1.13094	18.179
13	0.01K-0h-shoot	22.305	1.75686	23.9425	0.765582	25.071	0.229233	23.8079	0.440142	23.511	0.272276	24.9185	0.14086	27.0225	0.0325038	23.1075	1.23174	22.8215	0.902921	23.254	1.80565	26.152	0.772024	29.266	1.24626	26.8545	1.03708	28.078	0.881541	30.7825	0.68518	24.277	1.78792	24.482	1.21716	18.2255
14	0.01K-6h-shoot	22.86	3.74378	23.644	2.94778	23.979	1.52984	22.41	3.63112	23.961	0.624009	25.433	0.308711	26.718	0.125674	23.89	2.24186	24.497	0.884952	26.864	0.462979	24.563	7.27133	27.537	12.9341	29.066	0.701023	28.261	2.43108	28.829	8.30831	24.326	5.41059	27.741	0.398049	19.872
14	0.01K-6h-shoot	22.501	3.76199	23.27	2.99308	23.805	1.35227	22.426	2.8136	23.431	0.705951	24.865	0.358571	26.445	0.118977	23.724	1.97068	24.673	0.613728	26.864	0.362743	24.631	5.43477	27.199	12.8092	29.117	0.530172	28.003	2.27773	28.415	8.67315	24.612	3.47686	27.956	0.268691	19.52
14	0.01K-6h-shoot	22.126	3.80658	23.771	1.65019	23.41	1.3874	22.183	2.59803	23.141	0.673448	24.697	0.314325	26.934	0.066144	23.58	1.69901	24.144	0.690958	26.185	0.453137	24.264	5.46878	27.001	11.4645	28.812	0.511049	28.005	1.77473	28.025	8.86767	24.048	4.01051	27.55	0.277781	19.162
15	0.01K-24h-shoot	21.748	9.3017	22.872	5.78625	22.891	3.73831	21.837	6.20924	23.615	0.911705	22.98	1.94306	22.981	1.9262	21.956	9.84708	26.79	0.20757	25.883	1.05046	23.945	12.8279	28.904	5.76415	26.112	6.24427	26.582	8.94821	28.112	15.6985	23.389	11.9074	24.398	4.64287	20.073
15	0.01K-24h-shoot	21.684	7.24254	22.545	5.40625	22.322	4.1307	21.356	6.45499	23.487	0.742076	22.601	1.88208	23.345	1.11478	21.594	9.42633	26.69	0.165703	26.877	0.392842	23.652	11.7063	28.507	5.65336	25.825	5.67466	26.154	8.96684	27.815	14.3657	23.275	9.59834	24.067	4.35001	19.648
15	0.01K-24h-shoot	21.362	9.53012	22.403	6.27941	22.466	3.93506	21.582	5.80951	24.014	0.542103	22.733	1.80792	23.107	1.38391	21.6	9.88127	26.651	0.179204	25.647	0.969975	23.814	11.0136	28.783	4.91472	25.86	5.83015	26.189	9.21254	27.856	14.6981	23.148	11.0332	24.148	4.32895	19.722
16	0.01K-48h-shoot	22.635	2.82548	22.821	3.36739	22.364	3.02594	22.826	1.75737	22.779	0.914237	24.932	0.28211	22.621	1.38872	22.606	3.52518	22.759	1.90616	21.649	11.1041	24.073	6.5943	26.031	23.7212	29.976	0.240904	26.94	3.92203	27.604	12.5408	25.017	2.16413	24.812	1.95751	19.241
16	0.01K-48h-shoot	23.062	1.84228	22.807	2.98065	22.174	3.02594	22.672	1.71406	22.856	0.759773	24.588	0.31389	22.837	1.04808	22.255	3.94137	22.518	1.97475	21.965	7.81919	24.028	5.96374	26.061	20.3662	29.397	0.315461	26.872	3.604	27.425	12.4455	25.215	1.6538	24.948	1.56159	19.051
16	0.01K-48h-shoot	22.611	2.11476	22.581	2.92742	22.144	2.59437	23.11	1.06247	22.991	0.581012	24.537	0.273067	22.199	1.3696	22.103	3.67743	22.486	1.69545	21.739	7.67954	24	5.10609	25.804	20.4369	29.287	0.28589	26.763	3.26391	27.251	11.7905	25.317	1.29395	24.399	1.91855	18.799
