# Supplementary material for: Transcriptome-wide identification and expression analysis of the KT/HAK/KUP family in Salicornia europaea L. under varied NaCl and KCl treatments
Source: PeerJ. 2022 Mar 3;10:e12989. doi: 10.7717/peerj.12989 (PMC8898550; doi:10.7717/peerj.12989)
Supplement: Supplemental Information 6 [file peerj-10-12989-s006.xlsx]

## Sheet: NaCl treatment
Supplementary Table6. Real-time quantitative polymerase chain reaction (RT-qPCR) analysis of SeKUPs in S. europaea under NaCl treatments
		SeKUP1/10/12		SeKUP2		SeKUP3		SeKUP4		SeKUP5		SeKUP6		SeKUP7/9		SeKUP8/24		SeKUP11/13		SeKUP14		SeKUP15		SeKUP16		SeKUP17		SeKUP18/19		SeKUP20		SeKUP21/22		SeKUP23		UBC gene
Repeat	Treatments	Ct value	relative expression level	Ct value	relative expression level	Ct value	relative expression level	Ct value	relative expression level	Ct value	relative expression level	Ct value	relative expression level	Ct value	relative expression level	Ct value	relative expression level	Ct value	relative expression level	Ct value	relative expression level	Ct value	relative expression level	Ct value	relative expression level	Ct value	relative expression level	Ct value	relative expression level	Ct value	relative expression level	Ct value	relative expression level	Ct value	relative expression level
1	0Na-0h-root	19.544	0.842451	24.201	0.844063	21.469	0.640959	21.918	0.480365	20.774	0.561198	23.89	0.492783	19.615	1.12115	25.38	0.693924	19.471	0.939027	22.074	0.606847	22.596	0.917303	25.047	0.829302	24.136	0.944331	27.866	0.652183	29.139	0.570651	26.084	0.393304	23.61	0.667924	15.299
1	0Na-0h-root	19.865	1.16124	24.916	0.885413	21.438	1.12764	21.695	0.965403	20.003	1.64899	23.008	1.56376	20.954	0.763121	25.047	1.50509	20.066	1.07047	21.946	1.14187	22.995	1.19787	25.615	0.963242	24.442	1.31528	27.426	1.52346	28.943	1.12559	25.144	1.29928	23.134	1.59965	16.083
1	0Na-0h-root	20.079	0.996309	24.388	1.27052	21.304	1.2314	21.001	1.55423	21.058	0.789812	23.73	0.943453	20.399	1.11573	25.95	0.800986	20.171	0.990507	21.807	1.25128	23.425	0.884829	25.282	1.20746	25.264	0.740394	28.305	0.824361	28.724	1.30376	25.128	1.30741	24.254	0.732426	16.076
2	50Na-6h-root	22.037	1.08347	23.872	7.67636	23.317	1.28905	22.519	2.29295	21.141	3.1505	25.265	1.37556	23.023	0.764709	23.299	21.2568	22.639	0.756409	25.413	0.434192	22.522	6.99086	26.842	1.73024	31.074	0.0557596	31.965	0.275543	35.968	0.0363394	25.507	4.2478	27.03	0.4518	18.155
2	50Na-6h-root	22.285	1.06265	24.063	7.83223	23.405	1.41255	22.822	2.16475	21.232	3.44519	24.993	1.93458	23.001	0.904369	23.447	22.3445	22.734	0.82487	25.802	0.386196	22.421	8.73295	27.68	1.12738	31.288	0.055992	31.947	0.324963	35.824	0.0467685	25.798	4.04381	27.432	0.398253	18.375
2	50Na-6h-root	22.12	1.10394	23.999	7.58644	23.321	1.38732	22.431	2.63025	21.231	3.19448	25.198	1.55512	23.321	0.671278	23.337	22.3445	22.694	0.785803	26.489	0.222273	22.368	8.39465	27.793	0.965916	31.432	0.0469531	31.899	0.311294	35.76	0.0453008	25.623	4.23017	27.221	0.427133	18.265
3	50Na-24h-root	21.835	4.07462	23.892	24.7511	23.781	3.05528	21.992	10.8018	22.993	2.8532	25.39	4.12394	20.899	10.8979	26.702	6.5698	23.615	1.25722	25.776	1.10374	25.455	2.99275	29.033	1.23882	32.38	0.0737284	36.833	0.0308486	35.901	0.124454	27.114	4.55899	31.057	0.0906063	19.864
3	50Na-24h-root	20.981	4.07462	23.191	22.2606	22.876	3.16522	21.252	9.98113	22.182	2.76942	25.238	2.53507	20.048	10.8753	26.239	5.01014	22.781	1.23991	25.949	0.541639	25.84	1.26793	29.465	0.508025	32.064	0.0507786	36.317	0.0244055	35.295	0.104798	27.023	2.68648	31.178	0.0460951	19.01
3	50Na-24h-root	21.553	4.41883	23.919	21.6669	23.624	3.03838	21.989	9.65451	22.829	2.85123	25.591	3.19989	20.776	10.5852	26.864	5.2374	23.391	1.3097	25.457	1.22808	25.843	2.03986	29.219	0.971287	32.765	0.050358	36.771	0.028723	35.597	0.137041	27.449	3.2237	31.194	0.0734933	19.699
4	50Na-48h-root	23.001	0.888021	22.958	23.1257	23.396	1.95112	21.65	6.69555	22.183	2.44627	23.326	8.43287	20.951	5.14077	24.938	10.912	23.417	0.705266	23.322	2.95755	25.666	1.26441	26.344	3.90675	32.187	0.0412165	34.624	0.0697505	35.557	0.07725	27.853	1.33581	32.887	0.0124627	18.832
4	50Na-48h-root	23.184	0.815448	22.698	28.8685	23.405	2.02133	21.789	6.33877	22.168	2.5768	23.515	7.71156	21.164	4.62349	24.973	11.1028	23.284	0.806216	23.67	2.42234	24.594	2.77112	26.484	3.69601	32.3	0.0397298	34.591	0.0743949	35.424	0.0883075	27.772	1.47296	32.73	0.0144855	18.892
4	50Na-48h-root	23.119	0.83316	22.718	27.8079	23.374	2.01713	21.781	6.22556	22.097	2.64374	23.519	7.51109	21.387	3.86906	24.999	10.6505	23.421	0.716103	23.802	2.15906	24.672	2.56413	26.963	2.59003	32.188	0.0419369	34.635	0.0704795	35.448	0.0848277	27.391	1.87347	32.612	0.015354	18.858
5	200Na-0h-root	19.544	0.842451	24.201	0.844063	21.469	0.640959	21.918	0.480365	20.774	0.561198	23.89	0.492783	19.615	1.12115	25.38	0.693924	19.471	0.939027	22.074	0.606847	22.596	0.917303	25.047	0.829302	24.136	0.944331	27.866	0.652183	29.139	0.570651	26.084	0.393304	23.61	0.667924	15.299
5	200Na-0h-root	19.865	1.16124	24.916	0.885413	21.438	1.12764	21.695	0.965403	20.003	1.64899	23.008	1.56376	20.954	0.763121	25.047	1.50509	20.066	1.07047	21.946	1.14187	22.995	1.19787	25.615	0.963242	24.442	1.31528	27.426	1.52346	28.943	1.12559	25.144	1.29928	23.134	1.59965	16.083
5	200Na-0h-root	20.079	0.996309	24.388	1.27052	21.304	1.2314	21.001	1.55423	21.058	0.789812	23.73	0.943453	20.399	1.11573	25.95	0.800986	20.171	0.990507	21.807	1.25128	23.425	0.884829	25.282	1.20746	25.264	0.740394	28.305	0.824361	28.724	1.30376	25.128	1.30741	24.254	0.732426	16.076
6	200Na-6h-root	23.575	0.45334	25.737	2.5605	25.72	0.29613	22.857	2.20412	22.663	1.33291	22.804	9.20248	21.786	2.19008	24.977	8.07157	22.207	1.23991	24.717	0.854649	24.335	2.41742	26.7	2.31975	28.677	0.356844	32.507	0.229943	36.871	0.0236123	26.002	3.66221	28.732	0.168726	18.436
6	200Na-6h-root	23.525	0.496775	25.934	2.36432	25.62	0.335947	22.953	2.18283	22.703	1.37229	22.769	9.97988	22.316	1.60546	24.826	9.48633	22.212	1.30789	24.915	0.788621	24.427	2.40072	26.843	2.22371	28.828	0.340179	32.512	0.242549	36.714	0.0278666	25.895	4.17482	28.854	0.164112	18.518
6	200Na-6h-root	23.753	0.425628	25.772	2.65447	25.588	0.344674	22.71	2.59225	22.737	1.34498	22.785	9.90408	22.365	1.55723	24.801	9.68565	22.269	1.26159	25.057	0.717178	24.439	2.3891	26.981	2.02788	28.53	0.419681	32.556	0.23608	36.732	0.0276166	26.064	3.72623	28.789	0.172271	18.523
7	200Na-24h-root	21.311	1.7946	21.651	35.8381	21.239	5.45018	20.421	9.83008	20.93	3.65174	21.884	14.3504	21.983	1.5746	23.577	17.5555	20.658	2.99019	23.244	1.95532	23.674	3.15026	23.471	17.9259	29.632	0.151708	33.507	0.0947551	35.078	0.0674368	26.233	2.57169	28.13	0.211065	18.157
7	200Na-24h-root	21.416	1.76867	21.63	38.5437	21.38	5.23904	20.345	10.983	20.898	3.95748	21.881	15.2425	21.974	1.67944	23.604	18.263	20.737	3.00057	23.415	1.84089	23.702	3.27494	23.465	19.0797	29.502	0.175966	33.629	0.0922919	35.14	0.068473	26.33	2.54862	28.164	0.218508	18.241
7	200Na-24h-root	21.379	1.80834	21.689	36.8712	21.403	5.13834	20.365	10.7943	20.934	3.8466	21.781	16.2799	21.983	1.66322	23.557	18.8025	20.677	3.11717	23.311	1.97165	23.762	3.13067	23.392	20.0006	29.506	0.174871	33.624	0.0922919	35.53	0.052073	25.758	3.77563	28.179	0.215499	18.236
8	200Na-48h-root	22.027	2.0529	26.409	2.48875	24.468	1.09225	21.251	10.3906	23.791	0.944473	23.009	12.3636	22.798	1.68177	24.216	21.1832	23.94	0.577639	25.106	1.01073	24.497	3.34608	24.138	21.2144	29.814	0.251279	33.358	0.197421	35.534	0.0923771	26.398	4.31008	28.751	0.257877	19.067
8	200Na-48h-root	22.198	2.10769	26.34	3.01764	24.557	1.18699	21.353	11.1905	23.713	1.15235	23.051	13.8808	22.793	1.95069	24.37	22.0064	24.105	0.595527	25.159	1.12615	24.521	3.80387	24.356	21.0824	29.999	0.255495	33.533	0.202129	35.804	0.0885527	26.639	4.21553	28.88	0.272581	19.276
8	200Na-48h-root	22.034	2.22633	26.395	2.73857	24.676	1.03047	21.371	10.4194	23.677	1.11387	23.133	12.3636	22.716	1.9399	24.251	22.5312	24.12	0.555646	25.166	1.05658	24.613	3.36468	24.277	20.9949	29.791	0.278233	33.47	0.19907	35.587	0.097037	26.439	4.56532	28.829	0.266232	19.191
9	0Na-0h-shoot	21.069	1.4396	25.593	1.58164	24.123	0.500799	21.644	2.85641	21.264	1.96507	23.696	2.77218	21.399	1.60101	26.195	1.93972	20.738	1.91885	23.101	1.4645	24.159	1.52676	26.484	1.50626	25.856	1.40968	29	1.4614	30.129	1.41292	26.631	1.32383	25.464	0.908624	17.597
9	0Na-0h-shoot	21.664	1.40899	25.986	1.78067	23.825	0.91023	21.888	3.56574	21.649	2.22466	24.091	3.11671	22.247	1.31493	26.705	2.0137	21.048	2.28824	23.251	1.95126	24.799	1.44841	26.952	1.6099	25.965	1.93236	28.971	2.20434	30.498	1.6174	26.989	1.52702	25.96	0.952477	18.161
9	0Na-0h-shoot	21.679	1.41978	26	1.79555	23.89	0.885954	21.971	3.42761	21.511	2.49248	24.084	3.18882	22.357	1.24055	26.844	1.862	20.457	3.50944	23.302	1.91774	24.819	1.45445	26.963	1.62672	25.924	2.02422	28.956	2.26789	30.548	1.59072	26.965	1.58087	25.675	1.18161	18.187
10	50Na-6h-shoot	21.652	2.50996	24.372	9.62925	22.126	5.22092	24.309	1.17626	22.158	2.76175	24.696	3.62008	25.77	0.202078	24.339	18.3391	21.001	4.17634	23.591	2.72339	22.091	16.7196	23.827	24.8121	33.896	0.0139883	29.575	2.56214	30.438	2.97869	24.959	11.0174	31.343	0.0403233	18.982
10	50Na-6h-shoot	21.754	2.75426	24.78	8.54703	22.423	5.00477	23.872	1.87541	22.207	3.14396	25.108	3.20433	24.175	0.71896	24.806	15.6257	21.003	4.91176	23.614	3.15667	22.289	17.1659	23.975	26.3726	33.963	0.0157268	29.53	3.11309	30.456	3.46458	24.979	12.7968	31.751	0.0357914	19.218
10	50Na-6h-shoot	21.685	2.78112	24.67	8.87916	22.312	5.20286	23.989	1.66463	22.048	3.37897	24.785	3.85845	24.988	0.393922	24.609	17.2419	20.971	4.83407	23.579	3.11321	22.288	16.5352	23.94	26.0096	33.939	0.0153924	29.994	2.17249	30.533	3.16165	24.921	12.8235	31.676	0.036291	19.163
11	50Na-24h-shoot	20.576	5.9532	23.816	15.9272	21.576	8.5998	19.932	27.497	20.76	8.1884	22.562	17.8769	20.239	10.5121	24.124	23.9483	21.913	2.49707	21.714	11.2543	21.296	32.6378	22.781	57.6389	32.385	0.0448535	29.289	3.51457	30.1	4.23593	23.937	25.1714	28.743	0.275048	19.152
11	50Na-24h-shoot	20.587	6.297	23.778	17.4291	21.761	8.06293	19.966	28.625	20.822	8.36046	22.581	18.8047	20.288	10.8302	24.229	23.7334	21.819	2.84069	21.845	10.9541	21.318	34.2604	22.84	58.9725	32.445	0.0458595	29.359	3.56858	30.121	4.44961	23.971	26.204	28.751	0.291538	19.244
11	50Na-24h-shoot	20.565	6.25784	23.771	17.1415	21.667	8.42282	19.992	27.5161	20.876	7.88211	22.583	18.3795	20.267	10.7554	24.143	24.6557	21.888	2.65045	21.77	11.2934	21.386	31.9882	22.871	56.4918	32.39	0.0466288	29.279	3.69186	30.198	4.12868	23.959	25.8612	28.904	0.256629	19.213
12	50Na-48h-shoot	20.587	3.18803	22.419	22.6341	22.388	2.64323	23.092	1.66002	22.052	1.80448	23.121	6.54786	22.596	1.10725	23.331	22.391	21.849	1.40858	22.189	4.3693	21.596	14.3052	22.247	45.0349	31.983	0.0319811	28.509	3.25656	29.157	4.39444	23.479	18.6579	29.573	0.0834905	18.262
12	50Na-48h-shoot	20.508	3.28904	22.507	20.7987	22.187	2.96761	23.062	1.65543	22.131	1.66854	23.161	6.22047	22.724	0.989645	23.715	16.7588	21.824	1.39982	22.129	4.44876	21.576	14.1671	22.309	42.1357	31.901	0.0330631	28.489	3.22511	29.16	4.28317	23.542	17.4447	29.579	0.0812074	18.228
12	50Na-48h-shoot	20.606	3.13326	22.534	20.8131	22.386	2.63591	23.22	1.51278	22.203	1.61842	23.311	5.71607	22.629	1.07772	23.413	21.0661	21.936	1.32064	22.526	3.44476	21.658	13.6466	22.305	43.0807	31.931	0.0330173	28.571	3.10663	29.169	4.33995	23.719	15.7329	29.831	0.0695289	18.256
13	200Na-0h-shoot	21.069	1.4396	25.593	1.58164	24.123	0.500799	21.644	2.85641	21.264	1.96507	23.696	2.77218	21.399	1.60101	26.195	1.93972	20.738	1.91885	23.101	1.4645	24.159	1.52676	26.484	1.50626	25.856	1.40968	29	1.4614	30.129	1.41292	26.631	1.32383	25.464	0.908624	17.597
13	200Na-0h-shoot	21.664	1.40899	25.986	1.78067	23.825	0.91023	21.888	3.56574	21.649	2.22466	24.091	3.11671	22.247	1.31493	26.705	2.0137	21.048	2.28824	23.251	1.95126	24.799	1.44841	26.952	1.6099	25.965	1.93236	28.971	2.20434	30.498	1.6174	26.989	1.52702	25.96	0.952477	18.161
13	200Na-0h-shoot	21.679	1.41978	26	1.79555	23.89	0.885954	21.971	3.42761	21.511	2.49248	24.084	3.18882	22.357	1.24055	26.844	1.862	20.457	3.50944	23.302	1.91774	24.819	1.45445	26.963	1.62672	25.924	2.02422	28.956	2.26789	30.548	1.59072	26.965	1.58087	25.675	1.18161	18.187
14	200Na-6h-shoot	21.003	3.21689	23.126	18.6671	20.851	10.3267	21.45	6.97504	21.83	2.83349	22.308	15.4874	22.993	1.13209	23.795	21.8544	22.054	1.64517	22.657	4.25277	22.179	12.8569	23.745	21.4658	31.965	0.0435968	27.895	6.71016	29.256	5.52387	23.673	21.9586	28.033	0.326863	18.691
14	200Na-6h-shoot	21.014	3.18803	23.078	19.2718	20.835	10.4274	21.576	6.38286	21.833	2.82369	22.484	13.6897	22.954	1.1615	23.648	24.165	22.107	1.58363	22.605	4.40275	22.276	12.0042	23.71	21.9625	31.919	0.0449469	27.868	6.82746	29.543	4.52112	23.782	20.3325	28.026	0.327997	18.689
14	200Na-6h-shoot	21.001	3.19245	23.154	18.144	20.769	10.8326	21.588	6.28191	21.778	2.91114	22.532	13.1412	23.068	1.0651	23.634	24.2153	22.059	1.62477	22.774	3.88632	22.162	12.8926	23.763	21.0095	31.951	0.043627	27.743	7.38884	29.322	5.22952	23.753	20.5878	28.015	0.327997	18.678
15	200Na-24h-shoot	19.981	7.51965	22.198	40.8828	20.453	15.6632	19.791	25.3551	20.312	9.34103	21.695	27.2658	19.868	11.3686	23.599	28.817	20.528	5.45371	20.991	15.5345	20.978	34.0237	22.181	73.058	31.771	0.0574068	29.793	2.07247	29.867	4.16316	23.012	39.9664	27.689	0.477561	18.894
15	200Na-24h-shoot	19.961	7.93189	22.192	42.7077	20.554	15.1927	19.856	25.2149	20.317	9.68386	21.68	28.6611	19.936	11.2823	23.651	28.9171	20.554	5.57217	20.949	16.6379	20.989	35.1261	22.269	71.5049	31.802	0.0584507	29.696	2.30593	29.991	3.97424	23.011	41.6059	27.651	0.510066	18.951
15	200Na-24h-shoot	19.951	7.69364	22.189	41.2243	20.459	15.6306	19.881	23.8713	20.301	9.43212	21.651	28.1687	19.849	11.5433	23.698	26.9619	20.556	5.36002	20.876	16.8585	20.972	34.2367	22.2	72.2522	31.903	0.0524965	29.646	2.29954	29.915	4.03531	23.018	39.8834	27.571	0.519342	18.897
16	200Na-48h-shoot	21.134	2.29846	22.798	18.3337	21.631	4.70536	21.847	4.14451	21.906	2.10319	22.001	14.991	22.689	1.09352	23.233	25.2437	21.956	1.37768	22.161	4.69265	21.58	15.2366	21.897	60.4626	32.013	0.0329944	30.761	0.720139	29.617	3.36517	23.485	19.5719	27.821	0.296223	18.337
16	200Na-48h-shoot	21.026	2.58769	22.719	20.23	21.571	5.12412	21.974	3.96467	21.902	2.20317	22.092	14.7028	22.586	1.22687	23.256	25.9534	21.913	1.48271	22.04	5.33099	21.506	16.7544	21.893	63.3367	32.007	0.0346108	30.74	0.763314	29.575	3.61922	23.599	18.8922	27.77	0.32058	18.4
16	200Na-48h-shoot	21.038	2.73524	22.691	21.9846	21.715	4.94271	21.921	4.38386	21.875	2.3926	22.077	15.8348	22.703	1.20579	23.285	27.1118	21.945	1.54568	22.189	5.12447	21.528	17.5874	21.935	65.5703	32.169	0.0329715	30.744	0.811323	29.776	3.35585	23.63	19.7081	27.826	0.32868	18.492
